# Supplementary material for: Physical Exercise Induces Significant Changes in Immunoglobulin G N-Glycan Composition in a Previously Inactive, Overweight Population
Source: MDPI journal article supplement (doi:10.3390/biom13050762), 2023-04-27
Supplement: s1 [file s1]

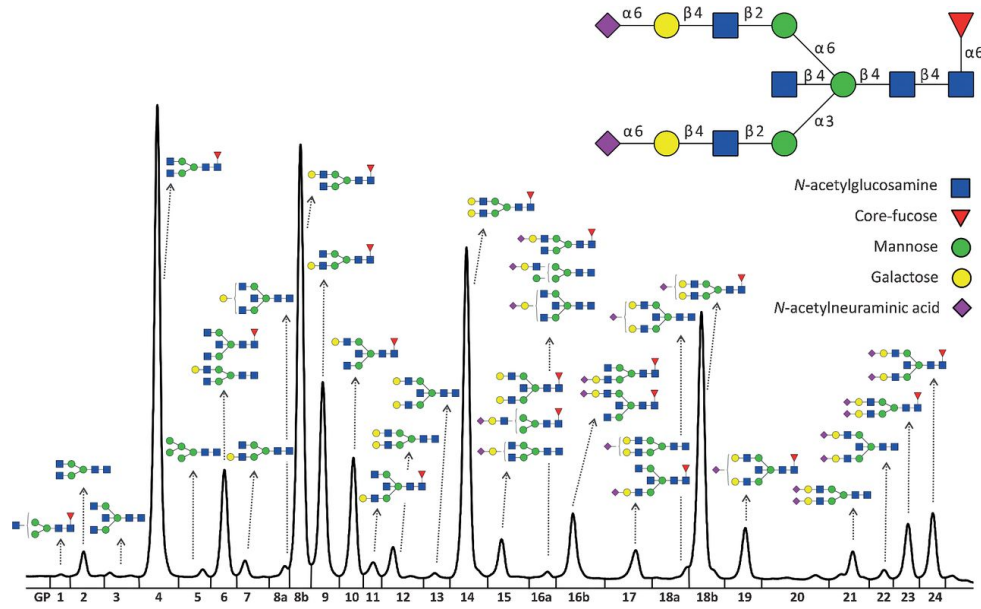

**Figure S1.** List of IgG N-glycan structures corresponding to individual glycan peaks.

**Table S1.** Formulae for calculation of IgG-derived glycan traits.

| Trait name | Description         | Trait formula                                                     |
|------------|---------------------|-------------------------------------------------------------------|
| G0         | Agactosylation      | GP1+GP2+GP4+GP6                                                   |
| G1         | Monogalactosylation | GP7+GP8+GP9+GP10+GP11+GP16                                        |
| G2         | Digalactosylation   | GP12+GP13+GP14+GP15+GP17+GP18+GP19+GP21+GP22+GP23+GP24            |
| S0         | Asialylation        | GP1+GP2+GP3+GP4+GP5+GP6+GP7+GP8+GP9+GP10+GP11+GP12+GP13+GP14+GP15 |
| S1         | Monosialylation     | GP16+GP17+GP18+GP19                                               |
| S2         | Disialylation       | GP21+GP22+GP23+GP24                                               |
| B          | Bisection           | GP6+GP10+GP11+GP13+GP15+GP19+GP22+GP24                            |
| CF         | Core fucosylation   | GP1+GP4+GP6+GP8+GP9+GP10+GP11+GP14+GP15+GP16+GP18+GP19+GP23+GP24  |

**Table S2.** Effect (s.d.), standard error (SE) and *p*-values for testing of exercise effect on IgG glycans (adjusted for age and sex). False discovery rate was controlled using Benjamini–Hochberg procedure.

| Trait | Effect (s.d.) | SE    | <i>p</i>               | <i>p</i> Adjusted      |
|-------|---------------|-------|------------------------|------------------------|
| G0    | 0.044         | 0.011 | $5.82 \times 10^{-5}$  | $1.00 \times 10^{-4}$  |
| G1    | 0.248         | 0.022 | $4.46 \times 10^{-26}$ | $2.41 \times 10^{-25}$ |
| G2    | -0.104        | 0.014 | $1.70 \times 10^{-12}$ | $4.93 \times 10^{-12}$ |
| B     | -0.004        | 0.012 | $7.41 \times 10^{-1}$  | $7.79 \times 10^{-1}$  |
| CF    | 0.514         | 0.041 | $5.42 \times 10^{-31}$ | $3.38 \times 10^{-30}$ |
| S0    | 0.249         | 0.024 | $3.54 \times 10^{-22}$ | $1.51 \times 10^{-21}$ |
| S1    | -0.091        | 0.015 | $3.19 \times 10^{-9}$  | $7.61 \times 10^{-9}$  |
| S2    | -0.526        | 0.043 | $1.88 \times 10^{-29}$ | $1.09 \times 10^{-28}$ |
| GP1   | -0.103        | 0.041 | $1.34 \times 10^{-2}$  | $1.78 \times 10^{-2}$  |

|      |        |       |                        |                        |
|------|--------|-------|------------------------|------------------------|
| GP2  | 0.033  | 0.012 | $7.08 \times 10^{-3}$  | $1.02 \times 10^{-2}$  |
| GP3  | 0.080  | 0.060 | $1.86 \times 10^{-1}$  | $2.01 \times 10^{-1}$  |
| GP4  | 0.048  | 0.011 | $3.19 \times 10^{-5}$  | $5.63 \times 10^{-5}$  |
| GP5  | -0.548 | 0.048 | $7.69 \times 10^{-26}$ | $3.66 \times 10^{-25}$ |
| GP6  | 0.015  | 0.010 | $1.37 \times 10^{-1}$  | $1.54 \times 10^{-1}$  |
| GP7  | 0.052  | 0.016 | $1.35 \times 10^{-3}$  | $2.06 \times 10^{-3}$  |
| GP8  | 0.180  | 0.016 | $1.19 \times 10^{-24}$ | $5.34 \times 10^{-24}$ |
| GP9  | 0.126  | 0.014 | $6.06 \times 10^{-17}$ | $2.05 \times 10^{-16}$ |
| GP10 | 0.065  | 0.012 | $4.63 \times 10^{-8}$  | $9.87 \times 10^{-8}$  |
| GP11 | -0.112 | 0.024 | $6.35 \times 10^{-6}$  | $1.17 \times 10^{-5}$  |
| GP12 | -0.027 | 0.016 | $8.61 \times 10^{-2}$  | $1.03 \times 10^{-1}$  |
| GP13 | 0.050  | 0.048 | $2.93 \times 10^{-1}$  | $3.12 \times 10^{-1}$  |
| GP14 | 0.032  | 0.012 | $7.34 \times 10^{-3}$  | $1.04 \times 10^{-2}$  |
| GP15 | 0.023  | 0.015 | $1.33 \times 10^{-1}$  | $1.51 \times 10^{-1}$  |
| GP16 | 0.026  | 0.017 | $1.26 \times 10^{-1}$  | $1.46 \times 10^{-1}$  |
| GP17 | -0.628 | 0.043 | $2.18 \times 10^{-38}$ | $1.47 \times 10^{-37}$ |
| GP18 | -0.025 | 0.012 | $4.61 \times 10^{-2}$  | $5.66 \times 10^{-2}$  |
| GP19 | -0.094 | 0.027 | $4.86 \times 10^{-4}$  | $8.03 \times 10^{-4}$  |
| GP20 | -0.577 | 0.062 | $1.50 \times 10^{-18}$ | $5.52 \times 10^{-18}$ |
| GP21 | -0.925 | 0.056 | $2.34 \times 10^{-46}$ | $2.37 \times 10^{-45}$ |
| GP22 | -0.139 | 0.052 | $8.05 \times 10^{-3}$  | $1.12 \times 10^{-2}$  |
| GP23 | -0.126 | 0.021 | $3.63 \times 10^{-9}$  | $8.39 \times 10^{-9}$  |
| GP24 | -0.095 | 0.029 | $1.01 \times 10^{-3}$  | $1.60 \times 10^{-3}$  |
